# Supplementary material
Source: ML conference proceedings conference paper supplement (https://proceedings.neurips.cc/paper_files/paper/2014/hash/375c71349b295fbe2dcdca9206f20a06-Abstract.html)
Supplement: Supplementary file [file 375c71349b295fbe2dcdca9206f20a06-Supplemental.zip]

---

# Supplementary material for: How transferable are features in deep neural networks?

---

Jason Yosinski,<sup>1</sup> Jeff Clune,<sup>2</sup> Yoshua Bengio,<sup>3</sup> and Hod Lipson<sup>4</sup>

<sup>1</sup> Dept. Computer Science, Cornell University

<sup>2</sup> Dept. Computer Science, University of Wyoming

<sup>3</sup> Dept. Computer Science & Operations Research, University of Montreal

<sup>4</sup> Dept. Mechanical & Aerospace Engineering, Cornell University

## A Training Details

Since Krizhevsky *et al.* (2012) won the ImageNet 2012 competition, there has naturally been much interest and work toward tweaking hyperparameters of large convolutional models. For example, Zeiler and Fergus (2013) found that it is better to decrease the first layer filters sizes from  $11 \times 11$  to  $7 \times 7$  and to use a smaller stride of 2 instead of 4. However, because this study aims not for maximum absolute performance but to use a commonly studied architecture, we used the reference implementation provided by Caffe (Jia *et al.*, 2014). We followed Donahue *et al.* (2013) in making a few minor departures from Krizhevsky *et al.* (2012) when training the convnets in this study. We skipped the data augmentation trick of adding random multiples of principle components of pixel RGB values, which produced only a 1% improvement in the original paper, and instead of scaling to keep the aspect ratio and then cropping, we warped images to  $256 \times 256$ . We also placed the Local Response Normalization layers just *after* the pooling layers, instead of before them. As in previous studies, including Krizhevsky *et al.* (2012), we use dropout (Hinton *et al.*, 2012) on fully connected layers except for the softmax output layer.

We trained with stochastic gradient descent (SGD) with momentum. Each iteration of SGD used a batch size of 256, a momentum of 0.9, and a multiplicative weight decay (for those weights with weight decay enabled, i.e. not for frozen weights) of 0.0005 per iteration. The master learning rate started at 0.01, and annealed over the course of training by dropping by a factor of 10 every 100,000 iterations. Learning stopped after 450,000 iterations. Each iteration took about  $\sim 1.7$  seconds on a NVidia K20 GPU, meaning the whole training procedure for a single network took  $\sim 9.5$  days.

Our base model attains a final top-1 error on the validation set of 42.5%, about the same as the 42.9% reported by Donahue *et al.* (2013) and 1.8% worse than Krizhevsky *et al.* (2012), the latter difference probably due to the few minor training differences explained above. We checked these values only to demonstrate that the network was converging reasonably. As our goal is not to improve the state of the art, but to investigate the properties of transfer, small differences in raw performance are not of concern.

Because code is often more clear than text, we've also made all code and parameter files necessary to reproduce these experiments available on <http://yosinski.com/transfer>.

## B How Much Does an AlexNet Architecture Overfit?

We observed relatively poor performance of random filters in an AlexNet architecture (Krizhevsky *et al.*, 2012) trained on ImageNet, which is in contrast to previously reported successes with random filters in a smaller convolutional networks trained on the smaller Caltech-101 dataset (Jarrett *et al.*, 2009). One hypothesis presented in the main paper is that this difference is observed because ImageNet is large enough to support training an AlexNet architecture without excessive overfitting. We sought to support or disprove this hypothesis by creating reduced size datasets containing the

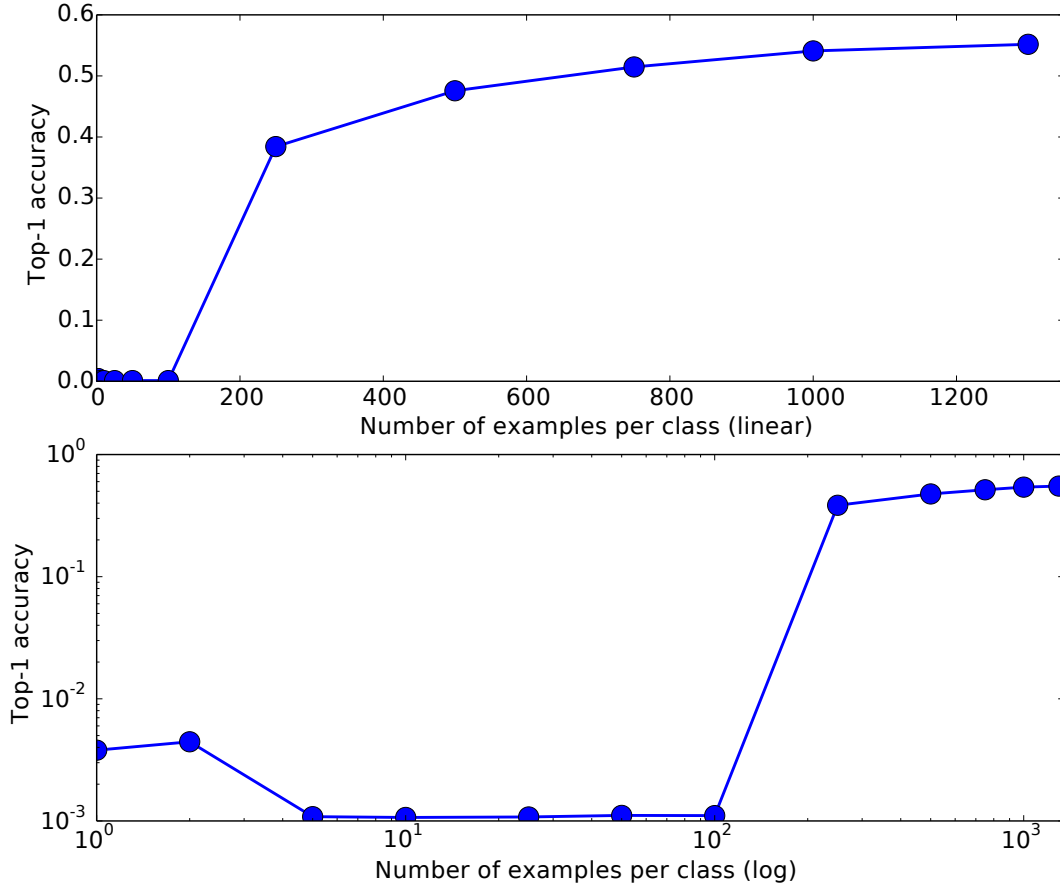

Figure S1: Top-1 validation accuracy for networks trained on datasets containing reduced numbers of examples. The largest dataset contains the entire ILSVRC2012 (Deng *et al.*, 2009) release with a maximum of 1300 examples per class, and the smallest dataset contains only 1 example per class (1000 data points in total). *Top*: linear axes. The slope of the rightmost line segment between 1000 and 1300 is nearly zero, indicating that the amount of overfit is slight. In this region the validation accuracy rises by 0.010820 from 0.54094 to 0.55176. *Bottom*: logarithmic axes. It is interesting to note that even the networks trained on a single example per class or two examples per class manage to attain 3.8% or 4.4% accuracy, respectively. Networks trained on  $\{5, 10, 25, 50, 100\}$  examples per class exhibit poor convergence and attain only chance level performance.

same 1000 classes as ImageNet, but where each class contained a maximum of  $n$  examples, for each  $n \in \{1300, 1000, 750, 500, 250, 100, 50, 25, 10, 5, 2, 1\}$ . The case of  $n = 1300$  is the complete ImageNet dataset.

Because occupying a whole GPU for this long was infeasible given our available computing resources, we also devised a set of hyperparameters to allow faster learning by boosting the learning rate by 25%, annealing by a factor of 10 after only 64,000 iterations, and stopping after 200,000 iterations. These selections were made after looking at the learning curves for the base case and estimating at which points learning had plateaued and thus annealing could take place. This faster training schedule was only used for the experiments in this section. Each run took just over 4 days on a K20 GPU.

The results of this experiment are shown in Figure S1 and Table S1. The rightmost few points in the top subplot of Figure S1 appear to converge, or nearly converge, to an asymptote, suggesting that validation accuracy would not improve significantly when using an AlexNet model with much more data, and thus, that the degree of overfit is not severe.

Table S1: An enumeration of the points in Figure S1 for clarity.

| Number<br>of examples<br>per class | Top-1<br>validation<br>accuracy |
|------------------------------------|---------------------------------|
| 1300                               | 0.55176                         |
| 1000                               | 0.54094                         |
| 750                                | 0.51470                         |
| 500                                | 0.47568                         |
| 250                                | 0.38428                         |
| 100                                | 0.00110                         |
| 50                                 | 0.00111                         |
| 25                                 | 0.00107                         |
| 10                                 | 0.00106                         |
| 5                                  | 0.00108                         |
| 2                                  | 0.00444                         |
| 1                                  | 0.00379                         |

## C Man-made vs. Natural Split

In order to compare transfer performance between tasks A and B such that A and B are as semantically dissimilar as possible, we sought to find two disjoint subsets of the 1000 classes in ImageNet that were as unrelated as possible. To this end we annotated each node  $x_i$  in the WordNet graph with a label  $n_i$  such that  $n_i$  is the number of distinct ImageNet classes reachable by starting at  $x_i$  and traversing the graph only in the parent  $\rightarrow$  child direction. The 20 nodes with largest  $n_i$  are the following:

| n_i  | x_i                                                                 |
|------|---------------------------------------------------------------------|
| 1000 | n00001740: entity                                                   |
| 997  | n00001930: physical entity                                          |
| 958  | n00002684: object, physical object                                  |
| 949  | n00003553: whole, unit                                              |
| 522  | n00021939: artifact, artefact                                       |
| 410  | n00004475: organism, being                                          |
| 410  | n00004258: living thing, animate thing                              |
| 398  | n00015388: animal, animate being, beast, brute, creature, fauna     |
| 358  | n03575240: instrumentality, instrumentation                         |
| 337  | n01471682: vertebrate, craniate                                     |
| 337  | n01466257: chordate                                                 |
| 218  | n01861778: mammal, mammalian                                        |
| 212  | n01886756: placental, placental mammal, eutherian, eutherian mammal |
| 158  | n02075296: carnivore                                                |
| 130  | n03183080: device                                                   |
| 130  | n02083346: canine, canid                                            |
| 123  | n01317541: domestic animal, domesticated animal                     |
| 118  | n02084071: dog, domestic dog, Canis familiaris                      |
| 100  | n03094503: container                                                |
| 90   | n03122748: covering                                                 |

Starting from the top, we can see that the largest subset, entity, contains all 1000 ImageNet categories. Moving down several items, the first subset we encounter containing approximately half of the classes is artifact with 522 classes. The next is organism with 410. Fortunately for this study, it just so happens that these two subsets are mutually exclusive, so we used the first to populate our *man-made* category and the second to populate our *natural* category. There are  $1000 - 522 - 410 = 68$  classes remaining outside these two subsets, and we manually assigned these to either category as seemed more appropriate. For example, we placed pizza, cup, and bagel into *man-made* and strawberry, volcano, and banana into *natural*. This process results in 551 and 449 classes, respectively. The 68 manual decisions are shown below, and the complete list of 551 man-made and 449 natural classes is available at <http://yosinski.com/transfer>.

### Classes manually placed into the man-made category:

n07697537 hotdog, hot dog, red hot  
n07860988 dough  
n07875152 potpie  
n07583066 guacamole  
n07892512 red wine  
n07614500 ice cream, icecream  
n09229709 bubble  
n07831146 carbonara  
n07565083 menu  
n07871810 meat loaf, meatloaf  
n07693725 bagel, beigel  
n07920052 espresso  
n07590611 hot pot, hotpot  
n07873807 pizza, pizza pie  
n07579787 plate  
n06874185 traffic light, traffic signal, stoplight  
n07836838 chocolate sauce, chocolate syrup  
n15075141 toilet tissue, toilet paper, bathroom tissue  
n07613480 trifle  
n07880968 burrito  
n06794110 street sign  
n07711569 mashed potato  
n07932039 eggnog  
n07695742 pretzel  
n07684084 French loaf  
n07697313 cheeseburger  
n07615774 ice lolly, lolly, lollipop, popsicle  
n07584110 consomme  
n07930864 cup

### Classes manually placed into the natural category:

n13133613 ear, spike, capitulum  
n07745940 strawberry  
n07714571 head cabbage  
n09428293 seashore, coast, seacoast, sea-coast  
n07753113 fig  
n07753275 pineapple, ananas  
n07730033 cardoon  
n07749582 lemon  
n07742313 Granny Smith  
n12768682 buckeye, horse chestnut, conker  
n07734744 mushroom  
n09246464 cliff, drop, drop-off  
n11879895 rapeseed  
n07718472 cucumber, cuke  
n09468604 valley, vale  
n07802026 hay  
n09288635 geyser  
n07720875 bell pepper  
n07760859 custard apple  
n07716358 zucchini, courgette  
n09332890 lakeside, lakeshore  
n09193705 alp  
n09399592 promontory, headland, head, foreland  
n07717410 acorn squash  
n07717556 butternut squash  
n07714990 broccoli  
n09256479 coral reef  
n09472597 volcano  
n07747607 orange  
n07716906 spaghetti squash  
n12620546 hip, rose hip, rosehip  
n07768694 pomegranate  
n12267677 acorn  
n12144580 corn  
n07718747 artichoke, globe artichoke  
n07753592 banana  
n09421951 sandbar, sand bar  
n07715103 cauliflower  
n07754684 jackfruit, jak, jack

## Supplementary References

- Deng, J., Dong, W., Socher, R., Li, L.-J., Li, K., and Fei-Fei, L. (2009). ImageNet: A Large-Scale Hierarchical Image Database. In *CVPR09*.
- Donahue, J., Jia, Y., Vinyals, O., Hoffman, J., Zhang, N., Tzeng, E., and Darrell, T. (2013). Decaf: A deep convolutional activation feature for generic visual recognition. Technical report, arXiv preprint arXiv:1310.1531.
- Hinton, G. E., Srivastava, N., Krizhevsky, A., Sutskever, I., and Salakhutdinov, R. (2012). Improving neural networks by preventing co-adaptation of feature detectors. Technical report, arXiv:1207.0580.
- Jarrett, K., Kavukcuoglu, K., Ranzato, M., and LeCun, Y. (2009). What is the best multi-stage architecture for object recognition? In *Proc. International Conference on Computer Vision (ICCV'09)*, pages 2146–2153. IEEE.
- Jia, Y., Shelhamer, E., Donahue, J., Karayev, S., Long, J., Girshick, R., Guadarrama, S., and Darrell, T. (2014). Caffe: Convolutional architecture for fast feature embedding. *arXiv preprint arXiv:1408.5093*.
- Krizhevsky, A., Sutskever, I., and Hinton, G. (2012). ImageNet classification with deep convolutional neural networks. In *Advances in Neural Information Processing Systems 25 (NIPS'2012)*.
- Zeiler, M. D. and Fergus, R. (2013). Visualizing and understanding convolutional networks. Technical Report Arxiv 1311.2901.
